# Supplementary material for: Importance of potassium ions for ribosome structure and function revealed by long-wavelength X-ray diffraction
Source: PubMed Central journal article supplement (PMC6555806; doi:10.1038/s41467-019-10409-4), 2019-06-07
Supplement: 41467_2019_10409_MOESM1_ESM.pdf [file 41467_2019_10409_MOESM1_ESM.pdf]

# Supplementary Information

## Importance of potassium ions for ribosome structure and function revealed by long-wavelength X-ray diffraction

Rozov et al.

Supplementary Figures 1-5

Supplementary Tables 1-4

Supplementary References

## SUPPLEMENTARY FIGURES

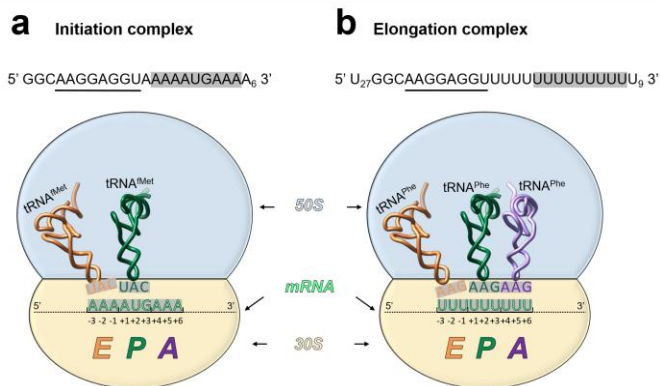

**Supplementary Fig. 1** Schematic representation of two 70S complexes used in the study. **a** Initiation complex contained 27 nt mRNA bound with tRNA<sub>1</sub><sup>fMet</sup> at the P- and E-sites. **b** Elongation complex contained 60 nt poly-Phe mRNA bound with tRNA<sup>Phe</sup> at the A-, P- and E-sites. The mRNA sequences for both complexes are specified, Shine-Dalgarno sequences are underlined, A-, P-, E-sites triplets are highlighted in green.

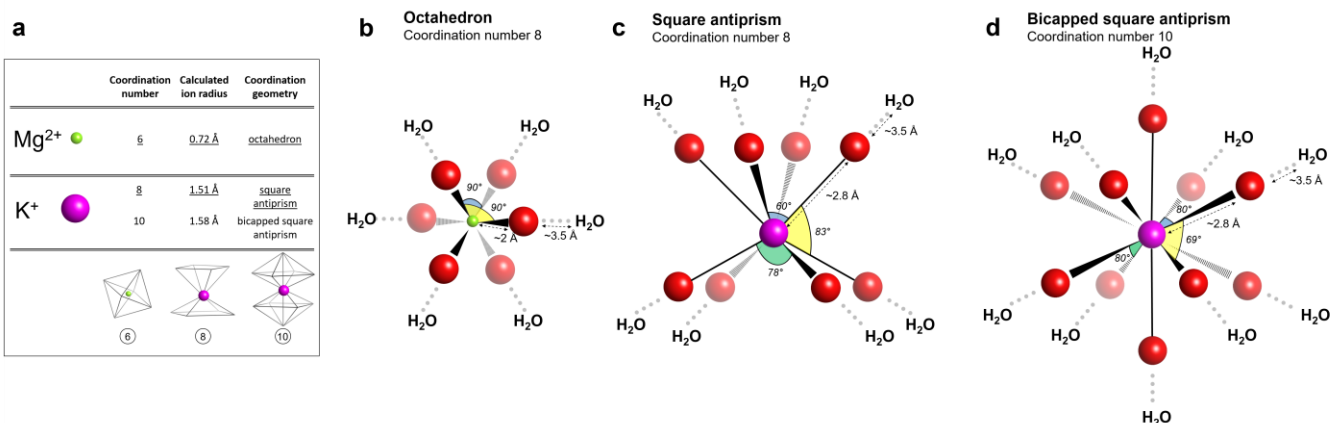

**Supplementary Fig. 2** Coordination of Mg<sup>2+</sup> and K<sup>+</sup> ions most frequently observed in the ribosome. **a** Metal ion coordination and their corresponding calculated radii<sup>1</sup> and geometry. **b-d** Three-dimensional scheme of idealized coordination of Mg<sup>2+</sup> (green) (**b**) and K<sup>+</sup> (magenta) (**c, d**) with oxygen atoms (red). Potential hydrated shells are shown as grey dots, angles and distances are indicated within the figures.

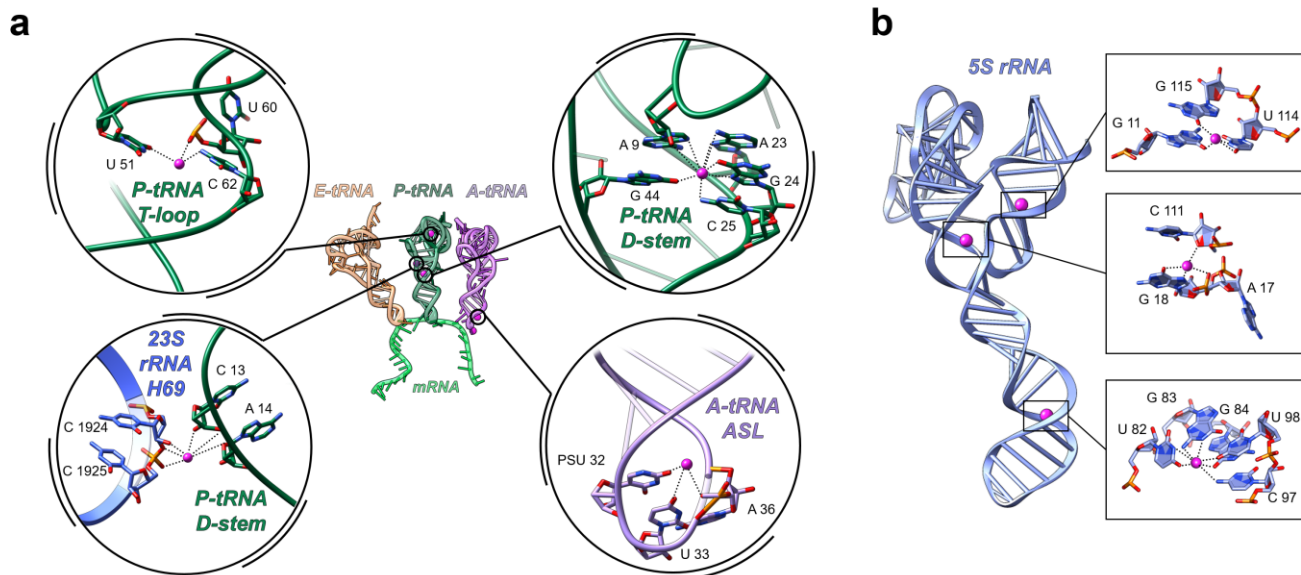

**Supplementary Fig. 3.**  $K^+$  ions coordinated to tRNAs and 5S rRNA. **a** Binding of tRNAs to the ribosome is stabilized by  $K^+$  in the T-loop, D-stem of the P-site tRNA and anticodon stem loop (ASL) of the A-tRNA. One of the  $K^+$  ions in the D-stem is additionally coordinated with H69 of the 23S rRNA. **b** Three  $K^+$  stabilize 5S rRNA architecture.

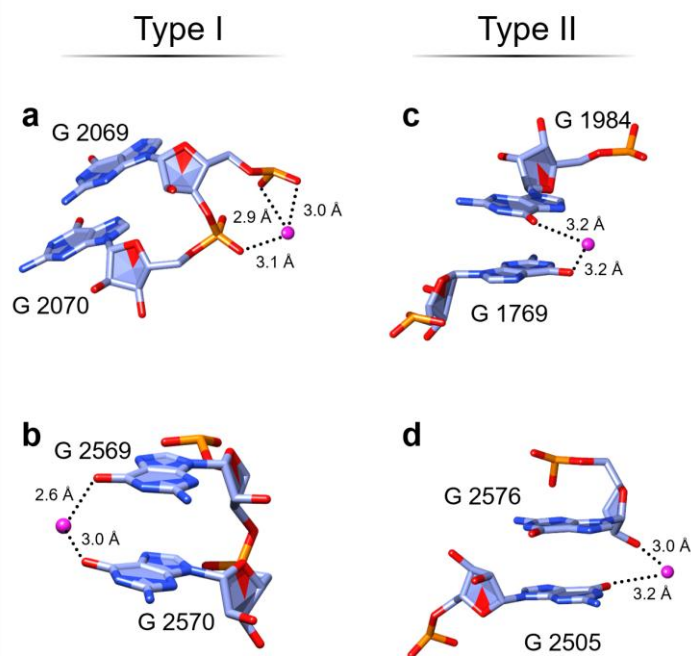

**Supplementary Fig. 4** Type I and II stabilization of G-G stacking pair is the most abundant interaction of  $K^+$  ions with the ribosome. Type I represents the class of interaction between two successive guanines in the same strand, either *via* backbone (**a**) or *via* bases (**b**). Type II interaction represents stabilization of distant guanines from different strands, either *via* bases (**c**), or *via* base-backbone coordination (**d**).

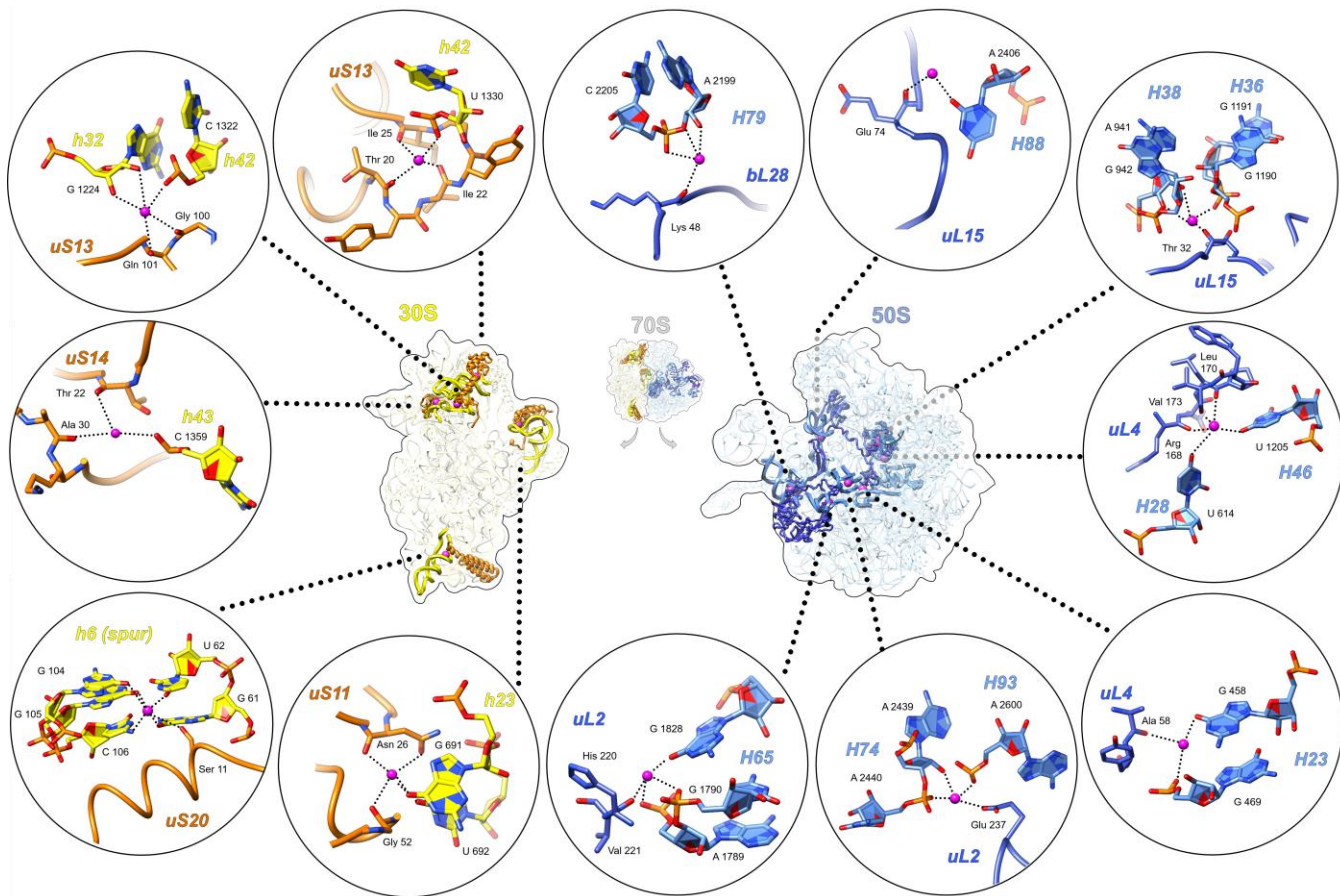

**Supplementary Fig. 5** Potassium ions (magenta) that mediate interaction of SSU r-proteins (orange) with 16S rRNA (yellow) and LSU r-proteins (blue) with 23S rRNA (light blue). tRNAs and mRNA are omitted from the figure.

## SUPPLEMENTARY TABLES

**Supplementary Table 1. Common K<sup>+</sup> ions between analyzed ribosomes.** There are two ribosomes within the asymmetric unit arbitrarily named A and B. Along the manuscript, EC vs IC comparison was given for ribosome A of the EC (EC-A) and ribosome B of the IC (IC-B). For determination of overlapping ions, pairwise comparisons between all four ribosomes were performed. Ribosomes were aligned on 23S rRNA. First, proximal K<sup>+</sup> ions with VDW overlap  $\geq -0.5$  Å were identified using “find clashes/contacts” option in Chimera. Second, all identified proximal K<sup>+</sup> ions were manually inspected and those having the same binding pocket were considered as common ions. The ions with no overlaps were considered as unique.

|             | <b>IC-A</b> | <b>IC-B</b> | <b>EC-A</b> | <b>EC-B</b> | <b>All common</b> | <b>Unique</b> | <b>Total</b> |
|-------------|-------------|-------------|-------------|-------------|-------------------|---------------|--------------|
| <b>IC-A</b> |             | 90          | 139         | 115         | 80                | 22            | 169          |
| <b>IC-B</b> | 90          |             | 94          | 98          | 80                | 17            | 127          |
| <b>EC-A</b> | 139         | 94          |             | 134         | 80                | 48            | 211          |
| <b>EC-B</b> | 115         | 98          | 134         |             | 80                | 8             | 155          |

**Supplementary Table 2 Data collection and processing statistics for Initiation complex**

|                                    | Dataset1A                                       | Dataset2A                                       | Dataset1B                                       | Dataset2B                                       |
|------------------------------------|-------------------------------------------------|-------------------------------------------------|-------------------------------------------------|-------------------------------------------------|
| X-ray energy, eV                   | 3700                                            | 3700                                            | 3500                                            | 3500                                            |
| X-ray wavelength, Å                | 3.351                                           | 3.351                                           | 3.542                                           | 3.542                                           |
| Space group                        | <i>P2<sub>1</sub>2<sub>1</sub>2<sub>1</sub></i> | <i>P2<sub>1</sub>2<sub>1</sub>2<sub>1</sub></i> | <i>P2<sub>1</sub>2<sub>1</sub>2<sub>1</sub></i> | <i>P2<sub>1</sub>2<sub>1</sub>2<sub>1</sub></i> |
| Cell dimensions                    |                                                 |                                                 |                                                 |                                                 |
| <i>a</i> , <i>b</i> , <i>c</i> (Å) | 210.01 449.49                                   | 210.17 450.55                                   | 210.38 448.31                                   | 210.48 450.55                                   |
|                                    | 615.49                                          | 619.07                                          | 616.21                                          | 618.84                                          |
| $\alpha$ , $\beta$ , $\gamma$ (°)  | 90.0 90.0 90.0                                  | 90.0 90.0 90.0                                  | 90.0 90.0 90.0                                  | 90.0 90.0 90.0                                  |
| Resolution (Å)                     | 362.996-4.65                                    | 364.287-4.44                                    | 362.52-4.65                                     | 364.24-4.85                                     |
|                                    | (4.77-4.65)*                                    | (4.56-4.44)                                     | (4.77-4.65)                                     | (4.98-4.85)                                     |
| <i>R</i> <sub>meas</sub>           | 17.7 (196.9)                                    | 20.6 (198.5)                                    | 14.4 (198.8)                                    | 21.0 (240.2)                                    |
| <i>I</i> / $\sigma$ <i>I</i>       | 6.85 (0.99)                                     | 6.47 (0.98)                                     | 8.14 (0.96)                                     | 6.11 (0.99)                                     |
| CC(1/2)**                          | 99.8 (34.1)                                     | 99.6 (41.0)                                     | 99.9 (42.9)                                     | 99.6 (38.0)                                     |
| Completeness (%)                   | 97.1 (94.6)                                     | 98.9 (96.1)                                     | 96.5 (92.0)                                     | 99.3 (98.0)                                     |

\*Numbers in parentheses refer to high-resolution shell

\*\*As reported by XSCALE<sup>2,3</sup>

**Supplementary Table 3 Data collection and processing statistics for Elongation complex**

|                             | Dataset1A                                       | Dataset2A                                       | Dataset3A                                       | Dataset4A                                       |
|-----------------------------|-------------------------------------------------|-------------------------------------------------|-------------------------------------------------|-------------------------------------------------|
| X-ray energy, eV            | 3700                                            | 3700                                            | 3700                                            | 3700                                            |
| X-ray wavelength, Å         | 3.351                                           | 3.351                                           | 3.351                                           | 3.351                                           |
| Space group                 | <i>P2<sub>1</sub>2<sub>1</sub>2<sub>1</sub></i> | <i>P2<sub>1</sub>2<sub>1</sub>2<sub>1</sub></i> | <i>P2<sub>1</sub>2<sub>1</sub>2<sub>1</sub></i> | <i>P2<sub>1</sub>2<sub>1</sub>2<sub>1</sub></i> |
| Cell dimensions             |                                                 |                                                 |                                                 |                                                 |
| <i>a, b, c</i> (Å)          | 211.25 448.40<br>620.12                         | 210.38 448.14<br>618.18                         | 210.13 450.01<br>622.23                         | 210.91 447.19<br>619.62                         |
| $\alpha, \beta, \gamma$ (°) | 90.0 90.0 90.0                                  | 90.0 90.0 90.0                                  | 90.0 90.0 90.0                                  | 90.0 90.0 90.0                                  |
| Resolution (Å)              | 363.36-4.41<br>(4.52-4.41)*                     | 362.83-4.99<br>(5.12-4.99)                      | 364.641-4.31<br>(4.42-4.31)                     | 362.615-4.00<br>(4.10-4.00)                     |
| <i>R<sub>meas</sub></i>     | 26.3 (168.3)                                    | 28.5 (200.2)                                    | 29.1 (158.9)                                    | 28.7 (186.5)                                    |
| <i>I</i> / $\sigma I$       | 6.28 (1.01)                                     | 5.31 (0.99)                                     | 5.73 (0.98)                                     | 6.08 (1.00)                                     |
| CC(1/2)**                   | 99.6 (47.6)                                     | 99.3 (41.3)                                     | 99.4 (32.0)                                     | 99.1 (25.3)                                     |
| Completeness (%)            | 99.1 (97.6)                                     | 99.3 (98.0)                                     | 99.2 (97.0)                                     | 97.5 (91.4)                                     |

\*Numbers in parentheses refer to high-resolution shell

\*\*As reported by XSCALE<sup>2,3</sup>

**Supplementary Table 3 continued**

|                             | Dataset1B                                       | Dataset2B                                       | Dataset3B                                       |
|-----------------------------|-------------------------------------------------|-------------------------------------------------|-------------------------------------------------|
| X-ray energy, eV            | 3500                                            | 3500                                            | 3500                                            |
| X-ray wavelength, Å         | 3.542                                           | 3.542                                           | 3.542                                           |
| Space group                 | <i>P2<sub>1</sub>2<sub>1</sub>2<sub>1</sub></i> | <i>P2<sub>1</sub>2<sub>1</sub>2<sub>1</sub></i> | <i>P2<sub>1</sub>2<sub>1</sub>2<sub>1</sub></i> |
| Cell dimensions             |                                                 |                                                 |                                                 |
| <i>a, b, c</i> (Å)          | 209.41 447.49<br>619.01                         | 210.40 448.12<br>618.67                         | 210.15 449.50<br>621.69                         |
| $\alpha, \beta, \gamma$ (°) | 90.0 90.0 90.0                                  | 90.0 90.0 90.0                                  | 90.0 90.0 90.0                                  |
| Resolution (Å)              | 362.652-5.85<br>(6.00-5.85)                     | 362.918-4.75<br>(4.87-4.75)                     | 364.261-5.10<br>(5.23-5.10)                     |
| <i>R<sub>meas</sub></i>     | 27.1 (163.3)                                    | 27.2 (156.4)                                    | 31.4 (162.5)                                    |
| <i>I</i> / $\sigma I$       | 5.37 (1.00)                                     | 5.59 (0.99)                                     | 4.44 (0.99)                                     |
| CC(1/2)**                   | 99.8 (40.4)                                     | 99.1 (52.6)                                     | 99.2 (44.0)                                     |
| Completeness (%)            | 99.9 (99.6)                                     | 98.6 (97.1)                                     | 99.7 (99.1)                                     |

\*Numbers in parentheses refer to high-resolution shell

\*\*As reported by XSCALE<sup>2,3</sup>

**Supplementary Table 4 Model refinement and validation statistics**

|                                     | Initiation<br>complex | Elongation<br>complex |
|-------------------------------------|-----------------------|-----------------------|
| Dataset PDB ID                      | 4V6G                  | 4V6F                  |
| Resolution (Å)                      | 226.09-3.50           | 223.10-3.10           |
| No. reflections                     | 743746                | 1041034               |
| Present work PDB ID                 | 6QNQ                  | 6QNR                  |
| $R_{\text{work}} / R_{\text{free}}$ | 18.74/25.13           | 19.64/25.32           |
| No. atoms                           |                       |                       |
| RNA                                 | 202857                | 207167                |
| Protein                             | 94097                 | 94998                 |
| Ligand/ion/water                    | 3553                  | 3589                  |
| <i>B</i> -factors                   |                       |                       |
| RNA                                 | 93.55                 | 73.87                 |
| Protein                             | 104.55                | 80.78                 |
| Ligand/ion/water                    | 67.21                 | 48.48                 |
| R.m.s. deviations                   |                       |                       |
| Bond lengths (Å)                    | 0.008                 | 0.009                 |
| Bond angles (°)                     | 1.403                 | 1.525                 |



## SUPPLEMENTARY REFERENCES

1. Lide, D. R. *CRC handbook of chemistry and physics : a ready-reference book of chemical and physical data*. (CRC Press, 2001).
2. Kabsch, W. Xds. *Acta Crystallographica Section D: Biological Crystallography* **66**, 125-132 (2010).
3. Karplus, P. A. & Diederichs, K. Linking crystallographic model and data quality. *Science* **336**, 1030-1033 (2012).
